# Supplementary material for: Effectiveness and treatment retention of TNF inhibitors when used as monotherapy versus comedication with csDMARDs in 15 332 patients with psoriatic arthritis. Data from the EuroSpA collaboration
Source: PubMed Central journal article supplement — Ann Rheum Dis. 2021 Jun 3;80(11):1410–8. doi: 10.1136/annrheumdis-2021-220097 (PMC8522446; doi:10.1136/annrheumdis-2021-220097), 2021-06-03

Supplementary figure S1: Hierarchical process for defining clinical remission

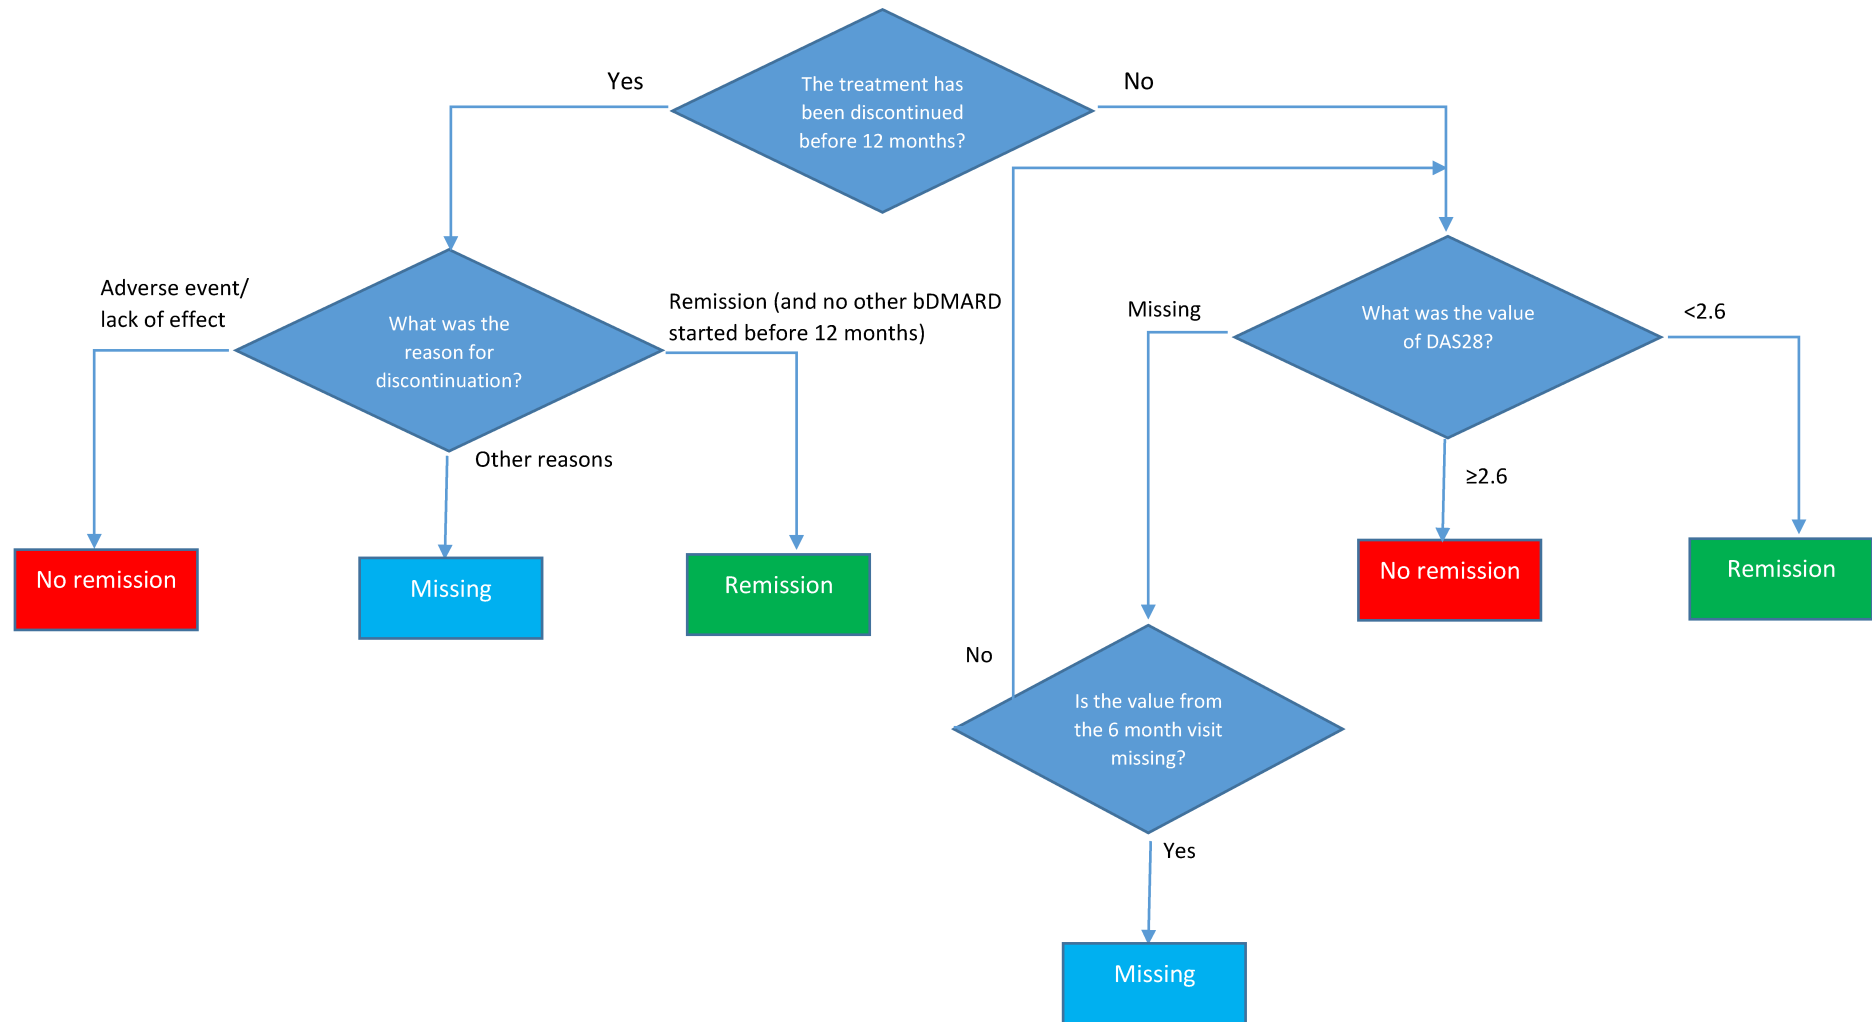

Supplementary table S1. Description of ethical approvals in the participating countries.

| Country        | Ethical approval                                                                                                                                                                                                                                                          | Reference                                                                        |
|----------------|---------------------------------------------------------------------------------------------------------------------------------------------------------------------------------------------------------------------------------------------------------------------------|----------------------------------------------------------------------------------|
| Switzerland    | Local ethical review board approval obtained in Geneva in January 2018.                                                                                                                                                                                                   | PB_2018-00023-(10-089).                                                          |
| Czech republic | Ethical approval for ATTRA was granted by the Czech Multicentre Research Ethics Committee. No additional ethical approval was required for the current analysis. All subjects provided their written consent for the collection and storage of data before participation. | No. 201611 S300.                                                                 |
| Denmark        | Not required for registry research                                                                                                                                                                                                                                        | Not applicable                                                                   |
| Spain          | Ethical approval was granted by the Hospital Clínic of Barcelona Ethics Committee (one of the participating centers) acting as a reference committee. All patients signed informed consent before register inclusion.                                                     | Approval code FER-ADA-2015-01. 22/May/2015.                                      |
| Iceland        | Ethical approval was granted by The National Bioethics Committee and the Icelandic Data Protection Authority.<br>No Informed Consent is required for registry research.                                                                                                   | Approval number: 18-009<br>Ref nr.:VSNb2018010004/03.01                          |
| Italy          | Ethical approval was granted by the IRB of University Hospital of Bari (the promoting centre) acting as a reference committee. All patients signed informed consent before register inclusion.                                                                            | Approval number: 598-CE 02/05/2011                                               |
| Norway         | Ethical approvals were granted by the Regional Committees for Medical and Health Research Ethics South East. All patients gave their written informed consent.                                                                                                            | Approval numbers: 105-00055, 2011/1339/REK sør-øst D and 2017/2041 REK sør-øst A |
| Portugal       | Ethical approval has been granted for the registry and all patients provide informed consent and authorize the use of their personal data for investigation, which must be approved by an ethics committee (no local approval required).                                  | Not applicable                                                                   |
| Romania        | No ethical approval required.                                                                                                                                                                                                                                             |                                                                                  |
| Sweden         | Ethical approval granted by the ethical review board in Stockholm.<br>No Informed Consent is required for registry research.                                                                                                                                              | dnr 2015/1844-31/2; 2017/2473-32/1                                               |
| Finland        | Ethical approval granted by the coordinating ethical committee of Helsinki and Uusimaa Hospital District                                                                                                                                                                  | 73/13/03/00/14                                                                   |
| Slovenia       | Ethical approval granted by the National Medical Ethics Committee at the Ministry of Health of the Republic of Slovenia                                                                                                                                                   | 0120-191/2016/2                                                                  |
| Turkey         | The study was approved by both Dokuz Eylul University ethical committee and Turkish Medicines and Medical Devices Agency of the Turkish Ministry of Health (#66175679-514.05.01-E.92906). Informed consent was obtained from all participants.                            | Approval number: 2018/21-02                                                      |

Supplementary table S2. Baseline characteristics (mean (SD) or percentages) of PsA patients starting their first TNFi monotherapy or in combination with a csDMARD by country, 2006-2017.

| TNFi in combination with csDMARD | Switzerland | Czech republic | Denmark     | Spain       | Iceland     | Italy       | Norway      | Portugal    | Romania     | Sweden      | Finland     | Slovenia    | Turkey      |
|----------------------------------|-------------|----------------|-------------|-------------|-------------|-------------|-------------|-------------|-------------|-------------|-------------|-------------|-------------|
| N (%)                            | 929 (65)    | 616 (80)       | 1525 (70)   | 345 (70)    | 146 (53)    | 412 (21)    | 514 (65)    | 413 (63)    | 101 (99)    | 3574 (65)   | 493 (78)    | 252 (72)    | 120 (57)    |
| Age, years                       | 49.7 (12.0) | 49.1 (11.4)    | 47.9 (11.7) | 49.0 (11.7) | 49.9 (13.1) | 48.4 (12.3) | 47.8 (12.0) | 48.8 (11.4) | 52.3 (12.0) | 49.5 (12.4) | 47.8 (11.4) | 49.5 (11.3) | 43.2 (12.8) |
| Sex (male)                       | 48.3%       | 52.9%          | 45.2%       | 49.9%       | 45.9%       | 48.8%       | 50.4%       | 46.2%       | 43.6%       | 51.3%       | 54.4%       | 53.6%       | 35.8%       |
| Disease duration, years          | 4.8 (6.1)   | 8.2 (7.3)      | 5.7 (6.9)   | 5.8 (5.5)   | 7.8 (8.3)   | 5.6 (6.6)   | 6.5 (7.6)   | 6.6 (6.3)   | 5.2 (7.2)   | 6.1 (7.4)   | 8.5 (8.4)   | 8.4 (7.2)   | 5.2 (5.3)   |
| CRP, mg/L                        | 10.1 (15.2) | 23.1 (23.1)    | 12.2 (18.4) | 9.2 (15.3)  | 12.7 (18.6) | 3.7 (12.9)  | 10.4 (16.7) | 19.3 (30.6) | 36.9 (37.7) | 13.4 (37.7) | 12.9 (16.6) | 16.4 (23.3) | 17.9 (22.3) |
| Tender joints 28                 | 4.7 (5.3)   | 10.1 (6.0)     | 6.5 (6.4)   | 4.7 (4.6)   | 5.8 (4.8)   | 5.5 (6.2)   | 4.2 (4.7)   | 7.0 (6.4)   | 11.9 (7.0)  | 5.7 (5.5)   | 3.8 (4.5)   | 8.6 (5.7)   | 5.6 (5.4)   |
| Swollen joints 28                | 3.3 (4.0)   | 7.4 (4.9)      | 2.8 (3.4)   | 2.9 (3.5)   | 4.3 (3.4)   | 2.6 (4.4)   | 2.2 (3.0)   | 4.5 (4.2)   | 7.2 (5.4)   | 3.7 (4.0)   | 3.6 (3.7)   | 7.6 (5.0)   | 2.4 (2.5)   |
| VAS global health, mm            | 51.3 (27.1) | 66.7 (21.1)    | 65.2 (24.3) | 59.6 (21.8) | 69.4 (22.8) | 58.5 (23.2) | 50.8 (23.2) | 60.8 (23.2) | 83.4 (9.9)  | 56.2 (23.1) | 50.4 (25.7) | 70.1 (16.8) | 61.0 (23.5) |
| VAS pain, mm                     | 52.4 (25.8) | 62.8 (21.8)    | 58.4 (23.7) | . (.)       | 64.9 (20.7) | 58.9 (24.2) | 46.1 (23.9) | 60.1 (24.1) | -           | 56.9 (22.6) | 53.6 (24.9) | 66.4 (24.5) | 62.7 (23.9) |
| DAPSA28                          | 23.3 (14.6) | 41.6 (16.1)    | 28.5 (15.6) | . (.)       | 31.0 (13.0) | 25.8 (18.1) | 19.1 (12.0) | 32.0 (16.1) | -           | 27.8 (15.1) | 25.0 (13.6) | 41.3 (17.2) | 27.5 (11.9) |
| DAS28 -CRP                       | 3.7 (1.2)   | 5.3 (1.0)      | 4.2 (1.2)   | 3.9 (1.0)   | 4.4 (1.0)   | 3.6 (1.2)   | 3.6 (1.1)   | 4.4 (1.2)   | 5.8 (1.0)   | 4.1 (1.1)   | 3.9 (1.1)   | 5.0 (1.0)   | 4.2 (1.0)   |
| Adalimumab, %                    | 40          | 48             | 34          | 34          | 6           | 40          | 15          | 30          | 47          | 27          | 41          | 54          | 42          |
| Certolizumab pegol, %            | 3           | 5              | 9           | 9           | 0           | 1           | 25          | 1           | 0           | 4           | 2           | 4           | 8           |
| Etanercept, %                    | 25          | 21             | 22          | 32          | 18          | 36          | 31          | 40          | 18          | 37          | 29          | 23          | 26          |
| Golimumab, %                     | 18          | 12             | 8           | 14          | 14          | 10          | 17          | 19          | 27          | 9           | 9           | 19          | 13          |
| Infliximab, %                    | 14          | 14             | 29          | 11          | 62          | 14          | 12          | 11          | 9           | 24          | 20          | 1           | 13          |
| <b>TNFi Monotherapy</b>          |             |                |             |             |             |             |             |             |             |             |             |             |             |
| N (%)                            | 506 (35)    | 152 (20)       | 652 (30)    | 151 (30)    | 132 (48)    | 1557 (79)   | 279 (35)    | 243 (37)    | <5 (1)      | 1888 (35)   | 140 (22)    | 99 (28)     | 92 (43)     |
| Age, years                       | 47.6 (12.9) | 46.3 (11.1)    | 47.8 (12.7) | 49.5 (11.1) | 49.2 (12.5) | 50.5 (12.2) | 47.9 (12.4) | 47.8 (11.5) | -           | 49.3 (13.2) | 48.4 (11.3) | 49.3 (12.3) | 41.6 (11.5) |
| Sex (male)                       | 54.7%       | 52%            | 45.4%       | 47%         | 37.1%       | 46.8%       | 48.7%       | 55.6%       | -           | 45.4%       | 55%         | 52.5%       | 46.7%       |
| Disease duration, years          | 5.1 (7.3)   | 8.2 (8.1)      | 5.1 (6.3)   | 7.0 (7.0)   | 6.0 (6.3)   | 6.4 (7.2)   | 6.6 (8.1)   | 6.4 (7.4)   | -           | 6.3 (8.0)   | 8.5 (8.3)   | 5.9 (5.8)   | 4.9 (5.8)   |
| CRP, mg/L                        | 10.0 (12.3) | 16.2 (19.4)    | 11.5 (19.8) | 3.9 (7.4)   | 9.3 (10.5)  | 3.8 (14.2)  | 10.5 (12.9) | 16.4 (22.2) | -           | 11.2 (17.4) | 12.4 (24.8) | 12.4 (18.2) | 16.1 (22.8) |
| Tender joints 28                 | 3.7 (5.0)   | 9.5 (7.0)      | 7.0 (7.4)   | 3.3 (4.7)   | 5.5 (3.9)   | 5.2 (6.2)   | 4.4 (5.6)   | 6.3 (6.2)   | -           | 5.6 (5.6)   | 2.4 (2.9)   | 7.9 (5.8)   | 4.3 (4.9)   |
| Swollen joints 28                | 2.5 (3.7)   | 6.7 (5.8)      | 2.5 (3.4)   | 2.0 (2.7)   | 4.2 (3.2)   | 2.1 (3.8)   | 1.8 (3.1)   | 4.3 (4.5)   | -           | 3.2 (3.9)   | 3.8 (5.4)   | 5.7 (5.3)   | 2.2 (3.1)   |
| VAS global health, mm            | 56.6 (26.3) | 68.9 (16.1)    | 67.3 (23.7) | 59.5 (23.3) | 68.1 (21.1) | 51.8 (28.7) | 53.4 (23.3) | 61.7 (25.4) | -           | 58.8 (23.0) | 46.0 (28.1) | 68.9 (17.7) | 67.8 (17.1) |
| VAS pain, mm                     | 54.6 (25.0) | 59.7 (23.7)    | 59.1 (22.8) | . (.)       | 62.2 (21.2) | 51.2 (29.3) | 46.7 (23.3) | 61.7 (24.0) | -           | 59.4 (22.9) | 52.7 (27.8) | 64.1 (22.4) | 69.8 (18.6) |

|                                                                                                                                                                                                                                                                                                        |             |             |             |           |             |             |             |             |   |             |             |             |             |
|--------------------------------------------------------------------------------------------------------------------------------------------------------------------------------------------------------------------------------------------------------------------------------------------------------|-------------|-------------|-------------|-----------|-------------|-------------|-------------|-------------|---|-------------|-------------|-------------|-------------|
| DAPSA28                                                                                                                                                                                                                                                                                                | 21.8 (14.3) | 39.3 (22.3) | 29.2 (17.2) | . (.)     | 30.5 (10.9) | 21.7 (17.5) | 19.6 (14.6) | 31.0 (20.0) | - | 27.4 (15.3) | 22.9 (14.6) | 36.6 (18.0) | 26.0 (12.3) |
| DAS28-CRP                                                                                                                                                                                                                                                                                              | 3.6 (1.2)   | 4.9 (1.2)   | 4.1 (1.3)   | 3.2 (1.1) | 4.3 (0.9)   | 3.2 (1.3)   | 3.6 (1.2)   | 4.3 (1.5)   | - | 4.0 (1.2)   | 3.6 (1.1)   | 4.6 (1.2)   | 4.0 (1.1)   |
| Adalimumab, %                                                                                                                                                                                                                                                                                          | 40          | 45          | 44          | 30        | 5           | 35          | 15          | 27          | - | 29          | 39          | 53          | 30          |
| Certolizumab pegol, %                                                                                                                                                                                                                                                                                  | 2           | 5           | 9           | 8         | 1           | 1           | 23          | 1           | - | 4           | 3           | 7           | 11          |
| Etanercept, %                                                                                                                                                                                                                                                                                          | 33          | 30          | 28          | 33        | 22          | 46          | 37          | 43          | - | 44          | 39          | 19          | 24          |
| Golimumab, %                                                                                                                                                                                                                                                                                           | 14          | 9           | 7           | 16        | 16          | 7           | 18          | 21          | - | 9           | 7           | 21          | 21          |
| Infliximab, %                                                                                                                                                                                                                                                                                          | 11          | 11          | 16          | 13        | 56          | 11          | 8           | 9           | - | 13          | 12          | 0           | 14          |
| Abbreviations:CRP=C-reactive protein, csDMARD=conventional synthetic disease modifying anti-rheumatic drugs, VAS=visual analogue scale, DAPSA28=disease activity index for psoriatic arthritis with 28 joints, DAS28=disease activity score with 28 joints, SD=standard deviation, TNFi=TNF-inhibitors |             |             |             |           |             |             |             |             |   |             |             |             |             |

Supplementary table S3. Percentage missing data per country.

| Country                                                                                                                                                                                                                                                                                                                                                                                       | Switzerland | Czech republic | Denmark | Spain | Iceland | Italy | Norway | Portugal | Romania | Sweden | Finland | Slovenia | Turkey | All |
|-----------------------------------------------------------------------------------------------------------------------------------------------------------------------------------------------------------------------------------------------------------------------------------------------------------------------------------------------------------------------------------------------|-------------|----------------|---------|-------|---------|-------|--------|----------|---------|--------|---------|----------|--------|-----|
| <b>Monotherapy baseline missing data</b>                                                                                                                                                                                                                                                                                                                                                      |             |                |         |       |         |       |        |          |         |        |         |          |        |     |
| Age                                                                                                                                                                                                                                                                                                                                                                                           | 0           | 0              | 0       | 0     | 0       | 0     | 0      | 0        | 0       | 0      | 0       | 0        | 0      | 0   |
| Sex                                                                                                                                                                                                                                                                                                                                                                                           | 0           | 0              | 0       | 0     | 0       | 0     | 0      | 0        | 0       | 0      | 0       | 0        | 0      | 0   |
| Disease duration                                                                                                                                                                                                                                                                                                                                                                              | 2           | 1              | 14      | 0     | 15      | 32    | 22     | 18       | 0       | 59     | 30      | 1        | 5      | 32  |
| Tender joints 28                                                                                                                                                                                                                                                                                                                                                                              | 53          | 10             | 27      | 44    | 27      | 32    | 7      | 66       | 0       | 29     | 66      | 4        | 32     | 32  |
| Swollen joints 28                                                                                                                                                                                                                                                                                                                                                                             | 51          | 9              | 27      | 44    | 27      | 32    | 7      | 66       | 0       | 28     | 64      | 4        | 30     | 32  |
| VAS pain, mm                                                                                                                                                                                                                                                                                                                                                                                  | 58          | 49             | 23      | 100   | 36      | 18    | 57     | 74       | 100     | 30     | 50      | 6        | 29     | 34  |
| VAS global health, mm                                                                                                                                                                                                                                                                                                                                                                         | 59          | 2              | 22      | 46    | 30      | 19    | 8      | 62       | 0       | 29     | 51      | 4        | 29     | 28  |
| DAS28-CRP                                                                                                                                                                                                                                                                                                                                                                                     | 67          | 11             | 34      | 53    | 32      | 40    | 14     | 75       | 0       | 38     | 71      | 4        | 33     | 41  |
| DAPSA28                                                                                                                                                                                                                                                                                                                                                                                       | 67          | 50             | 34      | 100   | 38      | 40    | 62     | 77       | 100     | 39     | 71      | 10       | 33     | 46  |
| Data on clinical remission at 12 month*                                                                                                                                                                                                                                                                                                                                                       | 48          | 11             | 13      | 56    | 22      | 52    | 10     | 35       | 0       | 29     | 55      | 3        | 26     | 35  |
| <b>Co-medication baseline missing data</b>                                                                                                                                                                                                                                                                                                                                                    |             |                |         |       |         |       |        |          |         |        |         |          |        |     |
| Age                                                                                                                                                                                                                                                                                                                                                                                           | 0           | 0              | 0       | 0     | 0       | 0     | 0      | 0        | 0       | 0      | 0       | 0        | 0      | 0   |
| Sex                                                                                                                                                                                                                                                                                                                                                                                           | 0           | 0              | 0       | 0     | 0       | 0     | 0      | 0        | 0       | 0      | 0       | 0        | 0      | 0   |
| Disease duration                                                                                                                                                                                                                                                                                                                                                                              | 1           | 0              | 10      | 0     | 12      | 25    | 25     | 8        | 0       | 59     | 17      | 0        | 3      | 28  |
| Tender joints 28                                                                                                                                                                                                                                                                                                                                                                              | 42          | 1              | 11      | 34    | 25      | 51    | 7      | 37       | 0       | 17     | 50      | 3        | 33     | 21  |
| Swollen joints 28                                                                                                                                                                                                                                                                                                                                                                             | 42          | 1              | 12      | 34    | 25      | 51    | 7      | 37       | 0       | 17     | 48      | 3        | 33     | 21  |
| VAS pain, mm                                                                                                                                                                                                                                                                                                                                                                                  | 52          | 40             | 11      | 100   | 26      | 24    | 46     | 48       | 100     | 19     | 33      | 1        | 32     | 30  |
| VAS global health, mm                                                                                                                                                                                                                                                                                                                                                                         | 53          | 0              | 10      | 37    | 23      | 25    | 4      | 42       | 0       | 18     | 36      | 3        | 32     | 21  |
| DAS28-CRP                                                                                                                                                                                                                                                                                                                                                                                     | 60          | 2              | 16      | 43    | 26      | 60    | 13     | 48       | 0       | 25     | 57      | 3        | 35     | 29  |
| DAPSA28                                                                                                                                                                                                                                                                                                                                                                                       | 60          | 41             | 17      | 100   | 29      | 60    | 54     | 51       | 100     | 25     | 57      | 4        | 35     | 38  |
| Data on clinical remission at 12 months*                                                                                                                                                                                                                                                                                                                                                      | 40          | 8              | 8       | 54    | 10      | 51    | 8      | 20       | 4       | 26     | 51      | 17       | 18     | 25  |
| Abbreviations: CRP= C-reactive protein, csDMARD= conventional synthetic disease modifying anti-rheumatic drugs, VAS= visual analogue scale, DAPSA28= disease activity index for psoriatic arthritis with 28 joints, DAS28= disease activity score with 28 joints, SD= standard deviation, TNFi= TNF-inhibitors. * According to the hierarchal definition outlined in supplementary figure S1. |             |                |         |       |         |       |        |          |         |        |         |          |        |     |

Supplementary table S4. Number of patients included in the country-specific secondary analyses (co-medication with methotrexate vs monotherapy) stratifying by type of TNFi.

| Country                                                                                       | Infliximab | Adalimumab | Etanercept |
|-----------------------------------------------------------------------------------------------|------------|------------|------------|
| <b>Number of patients included in Cox regression analyses: co-medication/monotherapy</b>      |            |            |            |
| Czech republic                                                                                | NA*        | 225/68     | 87/45      |
| Finland                                                                                       | NA*        | 146/54     | 97/55      |
| Italy                                                                                         | 41/169     | 110/542    | 106/721    |
| Portugal                                                                                      | NA*        | 94/66      | 133/104    |
| Spain                                                                                         | NA*        | 83/45      | 81/50      |
| Slovenia                                                                                      | NA*        | 109/52     | NA*        |
| Iceland                                                                                       | 84/74      | NA*        | NA*        |
| Switzerland                                                                                   | 87/56      | 220/203    | 142/168    |
| Sweden                                                                                        | 757/243    | 783/555    | 1075/836   |
| Norway                                                                                        | NA*        | 70/41      | 147/102    |
| Denmark                                                                                       | 357/102    | 441/289    | 253/179    |
| <b>Number of patients included in logistic regression analyses: co-medication/monotherapy</b> |            |            |            |
| Pooled                                                                                        | 1275/503   | 1790/1279  | 1603/1431  |
| Czech republic                                                                                | NA*        | 209/63     | 77/37      |
| Finland                                                                                       | NA*        | NA*        | NA*        |
| Italy                                                                                         | NA*        | 56/260     | 59/349     |
| Portugal                                                                                      | NA*        | 78/37      | 97/68      |
| Spain                                                                                         | NA*        | NA*        | NA*        |
| Slovenia                                                                                      | NA*        | 90/49      | NA*        |
| Iceland                                                                                       | NA*        | NA*        | NA*        |
| Switzerland                                                                                   | NA*        | 127/112    | 82/77      |
| Sweden                                                                                        | 581/176    | 592/409    | 762/556    |
| Norway                                                                                        | NA*        | 63/36      | 138/92     |
| Denmark                                                                                       | 334/95     | 396/250    | 231/154    |

Legend: NA = not included in the analysis due <30 patients in at least one of the exposure groups.

Supplementary figure S2. Overall TNFi retention regardless of co-medication, stratified by the participating registers.

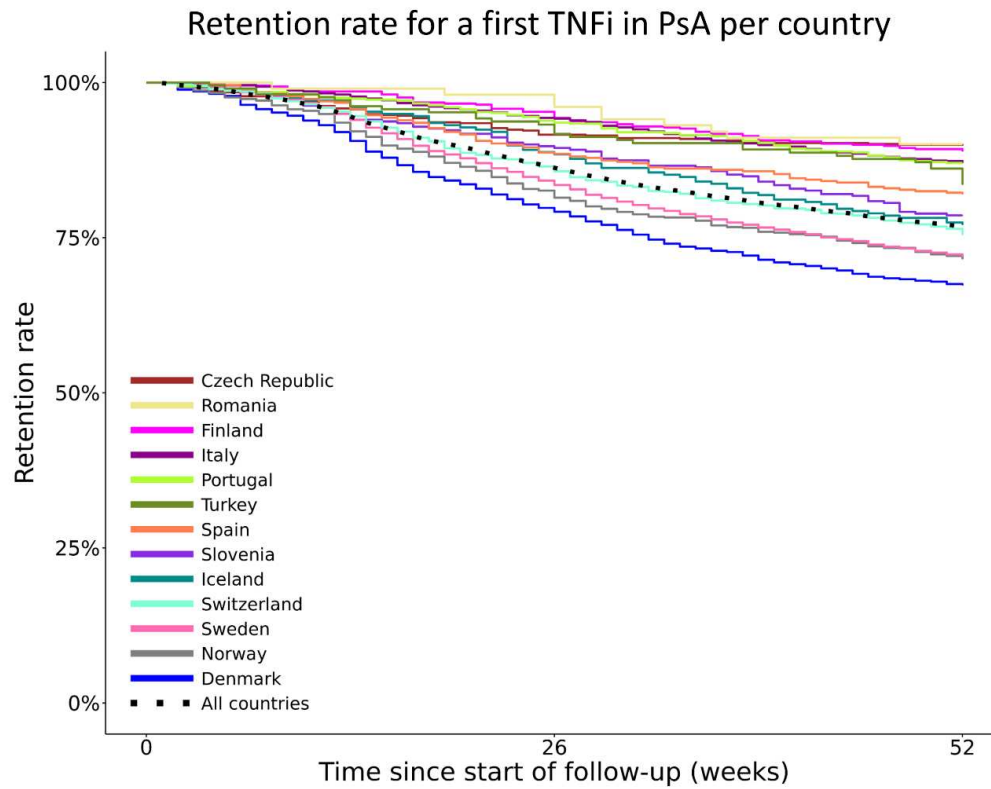

Supplementary figure S3. Baseline distribution of number of tender and swollen joints and DAS28 in the secondary analyses.

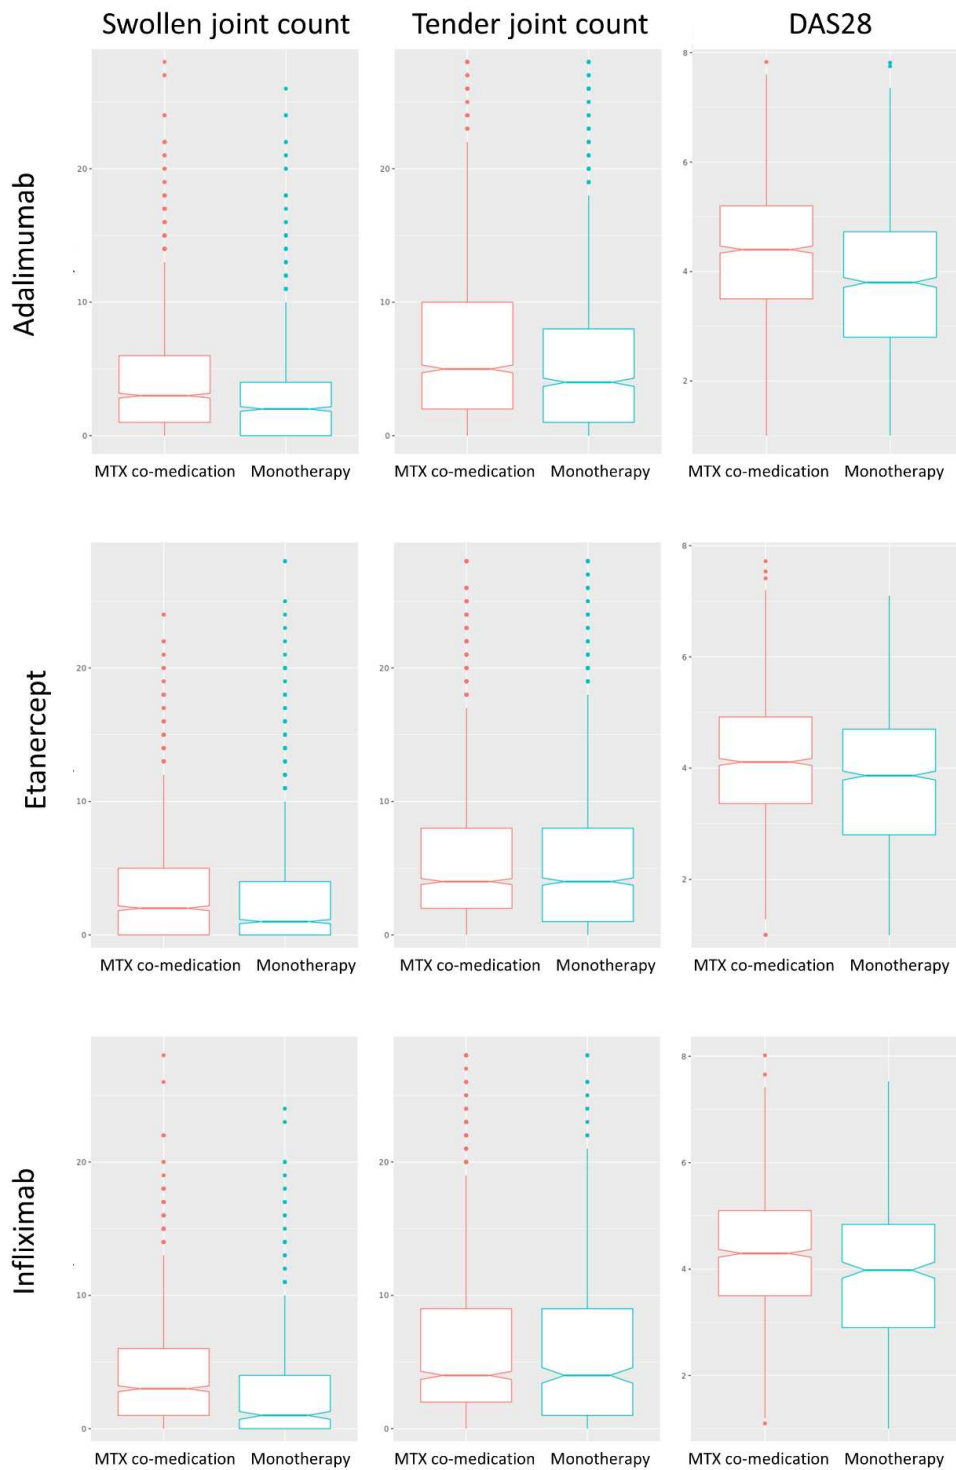

Supplement: annrheumdis-2021-220097supp001.pdf [file annrheumdis-2021-220097supp001.pdf]
